# Supplementary material
Source: PubMed Central journal article supplement (PMC5468637)
Supplement: pnas.1620542114.sapp.pdf [file pnas.1620542114.sapp.pdf]

## APPENDIX: SUPPORTING INFORMATION

### Participants

For all the online studies, a participant was defined as a row in the data file that had completed the task, was over 18, and was the first occurrence of that IP and MTurk ID (both within and across studies). The vagaries of participant recruitment meant that our pre-chosen sample sizes were often specified as minima, with some overshooting. Power calculations for mixed-effects models can be difficult, so we primarily based our estimates on simpler tests (e.g., a t-test to contrast two conditions) that are typically less sensitive than our actual analyses. Power calculations used G\*Power [1].

Study 1. The sample size was based on previous impression-formation studies, which have found that 20-25 participants per stimulus gives reliable measures (e.g., [3]). One participant was removed for having zero variance in their responses, demonstrating little engagement with the task. The final sample of participants rating the faces on the predictor variables comprised 9 males and 44 females, ages 18-50 ( $M = 20.0$ ,  $SD = 4.6$ ); 50.9% reporting English as their first language. The participants who rated the faces on the criterion variables (“Interest” or “Good Scientist”) comprised 16 males and 38 females, ages 18-40 ( $M = 21.4$ ,  $SD = 4.9$ ), 94% first-language English.

Study 2. Akin to study 1, sample size was based on obtaining 25-30 judgments per each dimension, so we sought to recruit at least 780 participants for the predictor variables and 120 for the criterion variables. The initial ratings of the criterion variables showed rather low reliability, so the criterion sample was boosted by 100 people. Four participants were removed for having zero variance in their responses, another was removed because of a computer error. The final sample who rated faces on the predictor dimensions comprised 450 males and 380 females, ages 18-72 ( $M = 35.3$ ,  $SD = 10.8$ ), 98% first-language English; the sample rating the faces on the criterion variables comprised 107 males and 99 females, ages 20-75 ( $M = 34.3$ ,  $SD = 10.3$ ), 97% first-language English. The numbers of participants rating each predictor trait/criterion variable are listed in Table S1.

| Variable                   | <i>N</i> |
|----------------------------|----------|
| Age                        | 68       |
| Capable                    | 56       |
| Competent                  | 66       |
| Effective                  | 58       |
| Fair                       | 53       |
| Friendly                   | 58       |
| Honest                     | 59       |
| Intelligent                | 62       |
| Likeable                   | 55       |
| Moral                      | 59       |
| Physically Attractive      | 58       |
| Sociable                   | 62       |
| Trustworthy                | 60       |
| Warm                       | 56       |
| Interest judgments         | 103      |
| “Good Scientist” judgments | 103      |

Table S1. Number of participants rating each dimension in Study 2.

Study 3. The sample size was based on 80% power to detect a small effect ( $w=0.1$ ) in a chi-square test of whether face type influences the article that is chosen, resulting in a desired sample size of at least 785 participants. (This study was based on a pilot study that indicated a small effect size; full details are available from the authors.) No participants were excluded. The final sample comprised 526 males, 323 females, ages 18-73 ( $M = 32.4$ ,  $SD = 10.6$ ), 93% first-language English, with 427 participants assigned to the Text condition and 422 to the Video condition.

Study 4. The sample size was based on 95% power to detect a small-to-medium effect size ( $d=0.2$ , based on the modest effect found in Study 3) in a within-subject t-test for an effect of face-type, resulting in a minimum required sample of 330 participants. Two participants were excluded for reporting technical issues (i.e., the photos did not load properly). The final sample comprised 192 males, 216 females, ages 18-74 ( $M = 35.9$ ,  $SD = 11.1$ ), 98% first-language English.

Study 5. The sample size was based on obtaining 95% power to detect a small-to-medium effect ( $d = 0.15$ ) in a within-subjects t-test comparing the two face types. Seventy participants were excluded for recognizing either of the two articles they read. The final sample comprised 261 males, 297 females, ages 18-81 ( $M = 36.4$ ,  $SD = 12.5$ ), 97% first-language English, with the Male-Biology, Male-Physics, Female-Biology, and Female-Physics conditions having 150, 144, 129, and 135 participants, respectively.”

Study 6. The minimum sample size of 800 participants was calculated based on 80% power to detect a small effect ( $d = 0.1$ , estimated from the effect size from Study 5). Participants were asked a simple memory/attention check question after reading the science stories; those who failed were redirected away from the survey and counted as “non-completers”. Of those who completed the task, 3 were excluded for reporting technical problems, and one was excluded for recognizing all of the articles. This study only excluded people who recognized all articles, whereas Study 5 excluded people who recognized any articles; this discrepancy arose because of an error when we submitted our pre-registration for Study 6, which was intended to have the same policy as Study 5. We decided it was best to keep to the publicly pre-registered plan for this study. The final sample comprised 369 males, 455 females, ages 19-73 ( $M = 37.5$ ,  $SD= 12.0$ ), 98% first-language English.

## Stimuli

Study 1. We randomly sampled photos of scientists from the departmental websites of the top-200 US Universities (National University Rankings, 2014). We randomly selected a university; if it had a genetics/human genetics department, then we randomly selected 10 photos of scientists from their departmental web pages; only photos of main faculty were selected. If the university did not have a genetics/human genetics department, then we randomly selected another university and randomly sampled 10 photographs of scientists from their web pages, and so on. Sampling continued until we had acquired at least 250 photos. This procedure was repeated for physics departments. We edited the photos (254 geneticists and 271 physicists) to have a grey background and cropped them to start at the top of the head and finish immediately below the chin, and to be reasonably centred. Images that were below 130 pixels in height were removed, and the remaining images were resized to have a height of 130 pixels. Poor-quality images were excluded, resulting in a final stimuli set of 108 photos of geneticists and 108 photos of physicists.

Study 2. We randomly sampled photos of biologists and physicists who had been submitted to the UK's 2014 Research Excellence Framework (REF), a nationwide audit of university research. The power calculation was based on one of the smallest effects of interest in Study 1, that of sociability of "Good scientist" judgments (partial  $R^2 = .024$ ); 85% power to detect this effect in a simple multiple regression requires at least 368 participants, so we sampled a total of 400 photos (200 from each discipline). We drew up a list of all scientists submitted to the relevant "unit of assessment" (Biological Science or Physics). After excluding 3 universities for which no photos were available, we randomly sampled from this list in proportion to the number of individuals from each university (e.g., the University of Cambridge constituted roughly 8% of the total researchers evaluated within the Biological Sciences unit of assessment, so Cambridge contributed roughly 8% of the biologists within our set of 200 photos). If the scientist selected did not have a suitable photo on the university webpages then we randomly selected another scientist within that university; if we were unable to reach the desired number of photos for a given university then we randomly sampled from the whole list of scientists. The photos were cropped around the top of the head and the shoulders, and standardised to 150 pixels in height. Any photos that were too blurry were replaced using the original sampling procedure.

Studies 3 and 4. The titles of 60 science news stories were collected from ScienceDaily.com, 30 from the "Health and Medicine" category, and 30 from the "Physics" category. In the pre-rating task, 105 participants were presented with either the biology or the physics titles, in a random order, and rated them on how interested they would be in reading the full article (0 – not at all interested, 10 – extremely interested). Mean interest ratings were computed for each title, averaging across participants. The titles selected for later studies had average ratings close to the mid-point of the scale, and similar ratings to each other (Table S2).

| <b>Biology Article Titles</b>                                                                                 | <b>Mean Rating</b> |
|---------------------------------------------------------------------------------------------------------------|--------------------|
| Opinions on vaccinations heavily influenced by online comments                                                | 5.12               |
| Confidence in government linked to willingness to vaccinate                                                   | 5.17               |
| Texting may be more suitable than apps in treatment of mental illness*                                        | 5.19               |
| Cow immune system inspires potential new therapies*                                                           | 5.27               |
| Reasons why winter gives flu a leg up could be key to prevention*                                             | 5.35               |
| Stress balls, DVDs and conversation ease pain, anxiety during surgery*                                        | 5.37               |
| Risk for autism increases for abandoned children placed in institutions                                       | 5.38               |
| Elementary teachers' depression symptoms related to students' learning                                        | 5.52               |
| <b>Physics Article Titles</b>                                                                                 | <b>Mean Rating</b> |
| Laser pulse turns glass into a metal: New effect could be used for ultra-fast logical switches                | 5.13               |
| Doing more with less: Steering a quantum path to improved internet security                                   | 5.17               |
| A 'Star Wars' laser bullet -- this is what it really looks like                                               | 5.23               |
| 'Solid' light could compute previously unsolvable problems                                                    | 5.25               |
| How to make mobile batteries last longer by controlling energy flows at nano-level                            | 5.26               |
| Universe may face a darker future: Is dark matter being swallowed up by dark energy?                          | 5.32               |
| Hunt for Big Bang particles offering clues to the origin of the universe                                      | 5.45               |
| Electronics that need very little energy? Nanotechnology used to help cool electrons with no external sources | 5.45               |

*Table S2. Mean interest ratings for article titles used in Studies 3 and 4. Titles marked with an asterisk were used in Study 4.*

The faces used in Study 4 were selected to score low or high on competence and attractiveness. Table S3 lists the mean ratings that the chosen faces had received in Study 2. As noted in the main text, the Competence manipulation was stronger than the Attractiveness manipulation: the mean Interest rating for the low-attractiveness faces is 4.89; that for the high-attractiveness faces is 5.38, giving a difference of only 0.49, compared with the difference of 0.99 between the low-competence and high-competence faces. Likewise, the low-attractiveness faces received “Good scientist” ratings that were only 0.86 above those of the high-attractiveness faces, as compared with a difference of 1.96 between the high- and low-competence faces.

|                  | Low Competence     |                     | High Competence    |                     |
|------------------|--------------------|---------------------|--------------------|---------------------|
|                  | Low attractiveness | High attractiveness | Low attractiveness | High attractiveness |
| Attractiveness   | 2.65               | 5.60                | 2.81               | 5.12                |
| Competence       | 4.62               | 5.02                | 6.65               | 6.69                |
| Interest         | 4.23               | 5.05                | 5.55               | 5.71                |
| “Good Scientist” | 4.96               | 4.34                | 7.16               | 6.06                |
| Age              | 42.38              | 26.07               | 52.62              | 42.02               |
| Sociability      | 5.80               | 4.61                | 5.64               | 4.91                |
| Morality         | 5.16               | 5.23                | 6.14               | 5.74                |
| Warmth           | 5.48               | 4.92                | 5.89               | 5.32                |

Table S3. Mean ratings for the face stimuli used in Studies 4 and 6.

Studies 5 and 6. Twenty scientific articles (10 biology and 10 physics) were selected from news websites (e.g., newser.com) and re-written in first person, and in an accessible fashion, simulating “scientist profiles” found in magazines. In the pre-rating task, 128 participants saw 5 biology and 5 physics articles (randomly selected and displayed), and rated them on questions related to the quality of research presented in the article, as well as their comprehension and recognition of the work, using 7-point scales (1=Not at all, 7=Extremely). Trials where the participant recognized the research were excluded, and mean quality ratings were computed by averaging across participants and questions. The articles selected for use had ratings close to the mid-point of the scale, good scores on comprehension and less than 10% recognition rate (Table S4).

| <b>Biology Articles</b>                                                | Mean Quality | Mean Comprehension | Recognition |
|------------------------------------------------------------------------|--------------|--------------------|-------------|
| Study Suggests Earth Life Began on Mars                                | 3.98         | 4.76               | 6.35%       |
| Slime Mould Is Smarter Than You Think                                  | 4.39         | 4.97               | 4.76%       |
| Beneath Pacific Lies Ancient, Barely Alive Bacteria                    | 4.52         | 5.18               | 1.49%       |
| Earth Holds 8.7M Species, and Most of Them are Still Undiscovered      | 4.52         | 5.17               | 4.76%       |
| <b>Physics Articles</b>                                                | Mean Quality | Mean Comprehension | Recognition |
| Dark Matter Particles Detected Deep in Mine                            | 4.01         | 4.84               | 9.52%       |
| Bloodhound Diary: It's rocket science                                  | 4.53         | 5.29               | 4.84%       |
| World's Next Timekeeper: Quantum Superclock?                           | 4.67         | 4.63               | 0%          |
| Final chapter to be published, in decades-long Gravity Probe B project | 4.69         | 3.91               | 1.56%       |

Table S4. Titles of articles use in studies 5 and 6; Study 6 only used the Physics stories.

## Counterbalancing

Study 3. We constructed three 8x8 Latin-squares that equally allocated articles to faces for each discipline, and four counterbalancing tables that equally allocated face-types to disciplines. Combining these gave 24 versions of the task, with participants randomly assigned to a version.

Study 4. The four article titles were paired with the four cells of the design (low/high attractiveness and low/high competence) using a 4x4 Latin Square; participants were randomly allocated to a version. One of the two photos with the appropriate attractiveness-competence combination was randomly selected on each trial.

Study 5. For each of the four gender-discipline combinations, we constructed a 4x4 Latin Square that ensured that each article was assigned to each face type equally often. Participants were randomly allocated to one of the resulting 16 versions of the task. On each trial, one of the two faces of the relevant type was randomly selected to be displayed alongside the article.

Study 6. The four articles were assigned to the four cells of the design using a 4x4 Latin square, creating four versions of the task with random allocation to version. On each trial, one of the two faces with the relevant competence-attractiveness combination was selected to be displayed alongside the allocated article.

### Consistency of measures

Table S5 shows Cronbach's alphas for the measures in Studies 1 and 2, and indicated good consistency. For Study 1, Cronbach's Alpha was calculated separately for each face-set (participants saw one of two face-sets) and the average is reported. For Study 2 there were 3 pairs of face-sets, where one member of each pair comprised 50% of the faces and the other member comprised the complimentary 50%. Cronbach's alpha was calculated for each combination of 3 non-complimentary sets (i.e., with no members of a pair in the analysis) and an average taken.

| Type                       | Measure          | Study 1 | Study 2 |
|----------------------------|------------------|---------|---------|
| <b>Predictor variables</b> | Capable          | -       | 0.74    |
|                            | Competent        | 0.85    | 0.78    |
|                            | Effective        | -       | 0.72    |
|                            | Intelligent      | 0.88    | 0.78    |
|                            | Friendly         | -       | 0.93    |
|                            | Likeable         | 0.91    | 0.84    |
|                            | Sociable         | -       | 0.91    |
|                            | Warm             | -       | 0.88    |
|                            | Kind             | 0.92    | -       |
|                            | Fair             | -       | 0.75    |
|                            | Honest           | 0.89    | 0.81    |
|                            | Moral            | -       | 0.79    |
|                            | Trustworthy      | 0.88    | 0.79    |
|                            | Age              | 0.99    | 0.99    |
| Physically Attractive      | 0.95             | 0.91    |         |
| <b>Composite measures</b>  | Competence       | 0.92    | 0.91    |
|                            | Sociability      | 0.95    | 0.95    |
|                            | Morality         | 0.95    | 0.92    |
| <b>Criterion variables</b> | "Good Scientist" | 0.89    | 0.89    |
|                            | Interest         | 0.72    | 0.75    |

*Table S5. Cronbach's Alpha values for the individual traits, outcomes and composite measures in Studies 1 and 2.*

### Confirmatory Factor Analysis

The correlations between the trait ratings are shown in Table S6 and S7, and are consistent with the three-factor structure we were expecting.

|             | Intelligent | Likeable | Kind   | Trustworthy | Honest |
|-------------|-------------|----------|--------|-------------|--------|
| Competent   | 0.860*      | 0.385*   | 0.404* | 0.543*      | 0.522* |
| Intelligent |             | 0.310*   | 0.376* | 0.515*      | 0.511* |
| Likeable    |             |          | 0.914* | 0.799*      | 0.850* |
| Kind        |             |          |        | 0.850*      | 0.904* |
| Trustworthy |             |          |        |             | 0.903* |

Table S6. Correlations among the items forming each trait for Study 1 (\* indicates  $p < .05$ ).

|             | Intel. | Capab. | Effect. | Lik.   | Soc.   | Friend. | Warm   | Trust. | Hon.   | Mor.   | Fair   |
|-------------|--------|--------|---------|--------|--------|---------|--------|--------|--------|--------|--------|
| Competent   | 0.678* | 0.715* | 0.727*  | 0.295* | 0.207* | 0.155*  | 0.244* | 0.454* | 0.405* | 0.459* | 0.338* |
| Intelligent |        | 0.737* | 0.675*  | 0.123* | 0.054  | 0.069   | 0.073  | 0.278* | 0.319* | 0.315* | 0.135* |
| Capable     |        |        | 0.733*  | 0.210* | 0.099* | 0.097   | 0.132* | 0.39*  | 0.404* | 0.387* | 0.192* |
| Effective   |        |        |         | 0.231* | 0.144* | 0.093   | 0.132* | 0.361* | 0.400* | 0.364* | 0.241* |
| Likeable    |        |        |         |        | 0.819* | 0.806*  | 0.825* | 0.742* | 0.727* | 0.729* | 0.799* |
| Sociable    |        |        |         |        |        | 0.890*  | 0.867* | 0.597* | 0.612* | 0.576* | 0.737* |
| Friendly    |        |        |         |        |        |         | 0.912* | 0.64*  | 0.692* | 0.624* | 0.744* |
| Warm        |        |        |         |        |        |         |        | 0.677* | 0.673* | 0.645* | 0.753* |
| Trustworthy |        |        |         |        |        |         |        |        | 0.786* | 0.808* | 0.709* |
| Honest      |        |        |         |        |        |         |        |        |        | 0.803* | 0.702* |
| Moral       |        |        |         |        |        |         |        |        |        |        | 0.704* |

Table S7. Correlations between the items forming each trait, for Study 2 (\* indicates  $p < .05$ ).

For both studies, we ran a CFA on the three-factor model: competence (comprising Competent and Intelligent in Study 1, and Competent, Intelligent, Capable, and Effective in Study 2), sociability (Study 1: Likeable and Kind; Study 2: Likeable, Sociable, Friendly, and Warm) and morality (Study 1: Trustworthy and Honest; Study 2: Trustworthy, Honest, Moral, and Fair). The models had an acceptable fit for both Study 1 (SRMR = .018, RMSEA = .102, CFI = .991, TLI = .978, BIC = 2056.26) and Study 2 (SRMR = .064, RMSEA = .128, CFI = .933, TLI = .913, BIC = 5579.77), supporting the three-factor model of social judgement.

For both studies, the three-factor model was a better fit than an alternative “competence and warmth” two-factor model in which “warmth” combines morality and sociability. For Study 1, the two-factor model had SRMR = .051, RMSEA = .247, CFI = .931, TLI = .870, BIC = 2139.70, and a chi-square test for the difference in model fit gave  $\chi^2_{diff}(2) = 94.19$ ,  $p < .001$ . For Study 2, SRMR = .107, RMSEA = .190, CFI = .845, TLI = .808, BIC = 6004.34,  $\chi^2_{diff}(2) = 436.56$ ,  $p < .001$ . The three-factor model also fit better than a single-factor model; Study 1: SRMR = .142, RMSEA = .419, CFI = .776, TLI = .627, BIC = 2370.55;  $\chi^2_{diff}(3) = 330.41$ ,  $p < .001$ ; Study 2: SRMR = .204, RMSEA = .284, CFI = .650, TLI = .572, BIC = 6969.18,  $\chi^2_{diff}(3) = 1407.4$ ,  $p < .001$ .



Correlations between the composite traits and the criterion variables in Studies 1 and 2 are shown in Table S8.

|                  | Competence | Sociability | Morality | “Good Scientist” | Interest |
|------------------|------------|-------------|----------|------------------|----------|
| Competence       |            | 0.39*       | 0.555*   | 0.778*           | 0.505*   |
| Sociability      | 0.168*     |             | 0.893*   | 0.098            | 0.632*   |
| Morality         | 0.424*     | 0.798*      |          | 0.304*           | 0.624*   |
| “Good Scientist” | 0.689*     | -0.069      | 0.163*   |                  | 0.182*   |
| Interest         | 0.585*     | 0.422*      | 0.534*   | 0.279*           |          |

*Table S8. Correlations between the composite traits and criterion variables. The top-half of the table (above the diagonal) represents Study 1, the bottom half represents Study 2 (\*indicates  $p < .05$ ).*

### Regression coefficients

Tables S9-S13 give the numeric values of the regression coefficients plotted in the main text, along with 95% CIs and  $p$ -values based on Satterthwaite-adjusted degrees of freedom. In all tables, P = participant, Sci = science engagement. Unless otherwise noted, all predictors were standardized (z-scored), with standardization prior to computing any interaction terms. Standardization was across participants for participant-level variables and across faces for face-level variables.

| INTEREST JUDGMENTS |         |                   |                    |       |         |                   |                    |       |
|--------------------|---------|-------------------|--------------------|-------|---------|-------------------|--------------------|-------|
|                    | Study 1 |                   |                    |       | Study 2 |                   |                    |       |
|                    | B       | CI <sub>low</sub> | CI <sub>high</sub> | $p$   | B       | CI <sub>low</sub> | CI <sub>high</sub> | $p$   |
| Age                | 0.047   | -0.072            | 0.166              | 0.446 | 0.074   | 0.012             | 0.137              | 0.021 |
| Female             | -0.115  | -0.242            | 0.011              | 0.084 | -0.051  | -0.141            | 0.039              | 0.268 |
| Non-white          | -0.009  | -0.079            | 0.060              | 0.792 | 0.032   | -0.014            | 0.078              | 0.176 |
| Physics            | 0.013   | -0.036            | 0.062              | 0.613 | -0.013  | -0.044            | 0.018              | 0.406 |
| Attractiveness     | 0.374   | 0.233             | 0.516              | <.001 | 0.213   | 0.142             | 0.284              | <.001 |
| Competence         | 0.136   | 0.022             | 0.251              | 0.026 | 0.200   | 0.122             | 0.277              | <.001 |
| Sociability        | 0.059   | -0.109            | 0.226              | 0.496 | 0.049   | -0.032            | 0.131              | 0.236 |
| Morality           | 0.124   | -0.007            | 0.255              | 0.068 | 0.132   | 0.039             | 0.225              | 0.006 |
| P_Age              | 0.030   | -0.332            | 0.393              | 0.872 | 0.020   | -0.226            | 0.265              | 0.876 |
| P_Female           | -0.169  | -0.564            | 0.226              | 0.409 | 0.273   | 0.024             | 0.523              | 0.034 |
| P_Sci              | 0.382   | -0.020            | 0.785              | 0.073 | 0.232   | -0.017            | 0.482              | 0.071 |

  

| "GOOD SCIENTIST" JUDGMENTS |         |                   |                    |       |         |                   |                    |       |
|----------------------------|---------|-------------------|--------------------|-------|---------|-------------------|--------------------|-------|
|                            | Study 1 |                   |                    |       | Study 2 |                   |                    |       |
|                            | B       | CI <sub>low</sub> | CI <sub>high</sub> | $p$   | B       | CI <sub>low</sub> | CI <sub>high</sub> | $p$   |
| Age                        | 0.177   | 0.056             | 0.298              | 0.007 | 0.059   | -0.019            | 0.137              | 0.140 |
| Female                     | -0.068  | -0.158            | 0.022              | 0.143 | 0.023   | -0.072            | 0.119              | 0.633 |
| Non-white                  | 0.079   | -0.034            | 0.192              | 0.179 | 0.040   | -0.014            | 0.094              | 0.146 |
| Physics                    | 0.039   | -0.015            | 0.094              | 0.160 | 0.024   | -0.019            | 0.067              | 0.283 |
| Attractiveness             | -0.252  | -0.382            | -0.122             | <.001 | -0.325  | -0.415            | -0.235             | <.001 |
| Competence                 | 0.698   | 0.578             | 0.819              | <.001 | 0.516   | 0.429             | 0.604              | <.001 |
| Sociability                | -0.152  | -0.282            | -0.022             | 0.023 | -0.123  | -0.203            | -0.043             | 0.003 |
| Morality                   | 0.204   | 0.046             | 0.362              | 0.012 | 0.111   | 0.003             | 0.219              | 0.045 |
| P_Age                      | -0.247  | -0.565            | 0.070              | 0.138 | -0.054  | -0.275            | 0.167              | 0.635 |
| P_Female                   | -0.099  | -0.418            | 0.220              | 0.548 | 0.152   | -0.072            | 0.376              | 0.187 |
| P_Sci                      | 0.026   | -0.294            | 0.345              | 0.877 | 0.128   | -0.084            | 0.340              | 0.239 |

Table S9. Regression coefficients for Studies 1 and 2.

To obtain a better estimate of the overall effect of each predictor, we pooled the data from Studies 1 and 2. The main text reports the results of simple pooling (with all predictors standardized across the pooled sample); Tables S10 and S11 show the regression coefficients, and those obtained when Study and its interactions are included as fixed-effects (with Study 1 coded -1, Study 2 coded +1; we did not standardize this variable). There is no indication that study modulated the other effects.

| INTEREST JUDGMENTS |                             |                   |                    |          |                                  |                   |                    |          |
|--------------------|-----------------------------|-------------------|--------------------|----------|----------------------------------|-------------------|--------------------|----------|
|                    | Studies 1 and 2 Pooled Data |                   |                    |          | Pooled Data with Effect of Study |                   |                    |          |
|                    | B                           | Cl <sub>low</sub> | Cl <sub>high</sub> | <i>p</i> | B                                | Cl <sub>low</sub> | Cl <sub>high</sub> | <i>p</i> |
| Age                | 0.073                       | 0.017             | 0.130              | 0.012    | 0.061                            | -0.005            | 0.128              | 0.070    |
| Female             | -0.063                      | -0.138            | 0.012              | 0.101    | -0.084                           | -0.173            | 0.006              | 0.069    |
| Non-white          | 0.026                       | -0.017            | 0.069              | 0.232    | 0.015                            | -0.032            | 0.062              | 0.531    |
| Physics            | -0.007                      | -0.034            | 0.019              | 0.586    | -0.000                           | -0.031            | 0.030              | 0.979    |
| Attractiveness     | 0.266                       | 0.197             | 0.336              | <.001    | 0.285                            | 0.204             | 0.365              | <.001    |
| Competence         | 0.215                       | 0.139             | 0.292              | <.001    | 0.177                            | 0.090             | 0.263              | <.001    |
| Sociability        | 0.057                       | -0.018            | 0.132              | 0.140    | 0.051                            | -0.041            | 0.143              | 0.276    |
| Morality           | 0.149                       | 0.058             | 0.240              | 0.002    | 0.139                            | 0.044             | 0.234              | 0.005    |
| P_Age              | -0.024                      | -0.235            | 0.186              | 0.820    | 0.028                            | -0.620            | 0.677              | 0.932    |
| P_Female           | 0.185                       | -0.032            | 0.402              | 0.097    | 0.048                            | -0.254            | 0.350              | 0.756    |
| P_Sci              | 0.265                       | 0.048             | 0.481              | 0.018    | 0.319                            | 0.018             | 0.620              | 0.040    |
| Study              |                             |                   |                    |          | -0.195                           | -0.876            | 0.486              | 0.576    |
| Study*Age          |                             |                   |                    |          | 0.015                            | -0.051            | 0.081              | 0.650    |
| Study*Female       |                             |                   |                    |          | 0.032                            | -0.058            | 0.122              | 0.485    |
| Study*Non-white    |                             |                   |                    |          | 0.023                            | -0.024            | 0.069              | 0.347    |
| Study*Physics      |                             |                   |                    |          | -0.013                           | -0.044            | 0.017              | 0.391    |
| Study*Att          |                             |                   |                    |          | -0.037                           | -0.118            | 0.043              | 0.365    |
| Study*Comp         |                             |                   |                    |          | 0.070                            | -0.016            | 0.156              | 0.114    |
| Study*Soc          |                             |                   |                    |          | 0.001                            | -0.091            | 0.093              | 0.979    |
| Study*Mor          |                             |                   |                    |          | 0.034                            | -0.061            | 0.129              | 0.483    |
| Study*P_Age        |                             |                   |                    |          | 0.000                            | -0.648            | 0.649              | 0.999    |
| Study*P_Female     |                             |                   |                    |          | 0.204                            | -0.098            | 0.506              | 0.187    |
| Study*P_Sci        |                             |                   |                    |          | -0.095                           | -0.397            | 0.206              | 0.537    |

Table S10. Regression coefficients for Interest Judgments when data from Studies 1 and 2 are pooled, either with or without including Study and its interactions with other variables.

**“GOOD SCIENTIST” JUDGMENTS**

|                 | Studies 1 and 2 Pooled Data |                   |                    |          | Pooled Data with Effect of Study |                   |                    |          |
|-----------------|-----------------------------|-------------------|--------------------|----------|----------------------------------|-------------------|--------------------|----------|
|                 | B                           | Cl <sub>low</sub> | Cl <sub>high</sub> | <i>p</i> | B                                | Cl <sub>low</sub> | Cl <sub>high</sub> | <i>p</i> |
| Age             | 0.094                       | 0.027             | 0.160              | 0.006    | 0.115                            | 0.040             | 0.191              | 0.003    |
| Female          | -0.004                      | -0.077            | 0.070              | 0.921    | -0.022                           | -0.109            | 0.064              | 0.613    |
| Non-white       | 0.056                       | 0.005             | 0.107              | 0.034    | 0.056                            | 0.002             | 0.110              | 0.044    |
| Physics         | 0.029                       | -0.006            | 0.063              | 0.102    | 0.031                            | -0.007            | 0.069              | 0.109    |
| Attractiveness  | -0.331                      | -0.414            | -0.247             | <.001    | -0.297                           | -0.392            | -0.202             | <.001    |
| Competence      | 0.600                       | 0.518             | 0.681              | <.001    | 0.592                            | 0.503             | 0.682              | <.001    |
| Sociability     | -0.139                      | -0.206            | -0.072             | <.001    | -0.135                           | -0.215            | -0.056             | 0.001    |
| Morality        | 0.167                       | 0.073             | 0.262              | 0.001    | 0.158                            | 0.058             | 0.258              | 0.002    |
| P_Age           | -0.009                      | -0.193            | 0.175              | 0.927    | -0.258                           | -0.654            | 0.138              | 0.204    |
| P_Female        | 0.072                       | -0.112            | 0.257              | 0.444    | 0.024                            | -0.218            | 0.266              | 0.846    |
| P_Sci           | 0.100                       | -0.083            | 0.283              | 0.284    | 0.087                            | -0.151            | 0.325              | 0.475    |
| Study           |                             |                   |                    |          | 0.290                            | -0.147            | 0.726              | 0.195    |
| Study*Age       |                             |                   |                    |          | -0.054                           | -0.130            | 0.021              | 0.160    |
| Study*Female    |                             |                   |                    |          | 0.046                            | -0.041            | 0.132              | 0.301    |
| Study*Non-white |                             |                   |                    |          | -0.009                           | -0.063            | 0.046              | 0.759    |
| Study*Physics   |                             |                   |                    |          | -0.008                           | -0.046            | 0.031              | 0.694    |
| Study*Att       |                             |                   |                    |          | -0.081                           | -0.176            | 0.014              | 0.098    |
| Study*Comp      |                             |                   |                    |          | 0.044                            | -0.045            | 0.134              | 0.333    |
| Study*Soc       |                             |                   |                    |          | 0.003                            | -0.077            | 0.083              | 0.945    |
| Study*Mor       |                             |                   |                    |          | -0.013                           | -0.112            | 0.087              | 0.803    |
| Study*P_Age     |                             |                   |                    |          | 0.206                            | -0.190            | 0.602              | 0.310    |
| Study*P_Female  |                             |                   |                    |          | 0.126                            | -0.116            | 0.367              | 0.310    |
| Study*P_Sci     |                             |                   |                    |          | 0.029                            | -0.209            | 0.267              | 0.812    |

*Table S11. Regression coefficients for “Good Scientist” judgments when data from Studies 1 and 2 are pooled, either with or without including Study and its interactions with other variables.*

## Testing for modulation by participant gender

Study 1 had more female participants than males (Study 2 showed a slight preponderance of males). To test whether participant gender modulates our results we re-ran our regression analyses including participant gender and its interaction with all other variables as additional predictors. (The analysis was as before, including the standardization of variables prior to computing interaction terms. We did not include by-face random slopes for any of these interaction terms because of convergence problems.) The regression coefficients are shown in Tables S12 and S13 and indicate that our results are consistent across male and female participants (only one of 40 interaction terms has  $p < .05$ ). Likewise, comparison of the models with and without the interaction terms indicated that the simpler models are to be preferred: Interest judgments for Study 1,  $\chi^2(10) = 5.50$ ,  $p = .955$ ,  $BIC_{no\_int} = 22137$ ,  $BIC_{int} = 22218$ ; for Study 2,  $\chi^2(10) = 11.90$ ,  $p = .292$ ,  $BIC_{no\_int} = 82123$ ,  $BIC_{int} = 82210$ ; “Good Scientist” judgments for Study 1  $\chi^2(10) = 11.89$ ,  $p = .292$ ,  $BIC_{no\_int} = 21846$ ,  $BIC_{int} = 21921$ ; for Study 2,  $\chi^2(10) = 8.13$ ,  $p = .616$ ,  $BIC_{no\_int} = 81706$ ,  $BIC_{int} = 81797$ .

| INTEREST JUDGMENTS |         |                   |                    |          |         |                   |                    |          |
|--------------------|---------|-------------------|--------------------|----------|---------|-------------------|--------------------|----------|
|                    | Study 1 |                   |                    |          | Study 2 |                   |                    |          |
|                    | B       | Cl <sub>low</sub> | Cl <sub>high</sub> | <i>p</i> | B       | Cl <sub>low</sub> | Cl <sub>high</sub> | <i>p</i> |
| Intercept          | 4.912   | 4.503             | 5.320              | 0.000    | 4.831   | 4.584             | 5.079              | 0.000    |
| Age                | 0.047   | -0.069            | 0.162              | 0.433    | 0.074   | 0.012             | 0.137              | 0.021    |
| Female             | -0.115  | -0.241            | 0.011              | 0.082    | -0.051  | -0.141            | 0.039              | 0.266    |
| Non-white          | -0.009  | -0.079            | 0.060              | 0.792    | 0.032   | -0.014            | 0.077              | 0.176    |
| Physics            | 0.013   | -0.036            | 0.062              | 0.613    | -0.013  | -0.044            | 0.018              | 0.408    |
| Attractiveness     | 0.374   | 0.235             | 0.514              | 0.000    | 0.213   | 0.143             | 0.284              | 0.000    |
| Competence         | 0.136   | 0.022             | 0.251              | 0.026    | 0.200   | 0.123             | 0.277              | 0.000    |
| Sociability        | 0.059   | -0.107            | 0.225              | 0.492    | 0.049   | -0.032            | 0.131              | 0.235    |
| Morality           | 0.124   | -0.008            | 0.255              | 0.069    | 0.132   | 0.039             | 0.224              | 0.006    |
| P_Age              | -0.071  | -0.718            | 0.577              | 0.832    | 0.036   | -0.214            | 0.286              | 0.776    |
| P_Female           | -0.218  | -0.700            | 0.264              | 0.383    | 0.275   | 0.027             | 0.524              | 0.032    |
| P_Sci              | 0.388   | -0.007            | 0.782              | 0.064    | 0.247   | -0.005            | 0.499              | 0.057    |
| P_Female*Age       | -0.072  | -0.185            | 0.041              | 0.222    | -0.037  | -0.096            | 0.022              | 0.220    |
| P_Female*Female    | -0.021  | -0.146            | 0.104              | 0.744    | 0.037   | -0.050            | 0.124              | 0.401    |
| P_Female*Non-white | 0.006   | -0.060            | 0.073              | 0.852    | -0.025  | -0.068            | 0.018              | 0.251    |
| P_Female*Physics   | -0.018  | -0.062            | 0.026              | 0.416    | -0.020  | -0.047            | 0.007              | 0.147    |
| P_Female*Att       | 0.027   | -0.110            | 0.164              | 0.701    | 0.024   | -0.043            | 0.091              | 0.491    |
| P_Female*Comp      | 0.004   | -0.109            | 0.117              | 0.943    | 0.060   | -0.014            | 0.133              | 0.115    |
| P_Female*Soc       | 0.084   | -0.075            | 0.243              | 0.306    | 0.008   | -0.068            | 0.085              | 0.831    |
| P_Female*Mor       | -0.032  | -0.149            | 0.085              | 0.592    | 0.036   | -0.047            | 0.120              | 0.396    |
| P_Female*P_Age     | 0.235   | -0.715            | 1.184              | 0.632    | 0.015   | -0.237            | 0.266              | 0.910    |
| P_Female*P_Sci     | 0.237   | -0.173            | 0.647              | 0.268    | -0.131  | -0.384            | 0.121              | 0.311    |

Table S12. Regression coefficients for Interest judgments when interactions between Participant Gender and all other predictors are included.

**"GOOD SCIENTIST" JUDGMENTS**

|                  | Study 1 |                   |                    |       | Study 2 |                   |                    |       |
|------------------|---------|-------------------|--------------------|-------|---------|-------------------|--------------------|-------|
|                  | B       | Cl <sub>low</sub> | Cl <sub>high</sub> | p     | B       | Cl <sub>low</sub> | Cl <sub>high</sub> | p     |
| Intercept        | 5.664   | 5.360             | 5.967              | 0.000 | 5.752   | 5.526             | 5.977              | 0.000 |
| Age              | 0.177   | 0.057             | 0.297              | 0.006 | 0.059   | -0.019            | 0.136              | 0.141 |
| Female           | -0.068  | -0.156            | 0.019              | 0.132 | 0.023   | -0.072            | 0.119              | 0.635 |
| Non-white        | 0.079   | -0.034            | 0.192              | 0.178 | 0.040   | -0.014            | 0.093              | 0.147 |
| Physics          | 0.039   | -0.015            | 0.094              | 0.160 | 0.024   | -0.019            | 0.067              | 0.282 |
| Attractiveness   | -0.252  | -0.381            | -0.123             | 0.000 | -0.325  | -0.415            | -0.235             | 0.000 |
| Competence       | 0.698   | 0.579             | 0.818              | 0.000 | 0.516   | 0.429             | 0.604              | 0.000 |
| Sociability      | -0.152  | -0.282            | -0.022             | 0.023 | -0.123  | -0.203            | -0.043             | 0.003 |
| Morality         | 0.204   | 0.046             | 0.362              | 0.012 | 0.112   | 0.004             | 0.220              | 0.043 |
| P_Age            | -0.205  | -0.578            | 0.167              | 0.289 | -0.113  | -0.354            | 0.128              | 0.360 |
| P_Female         | -0.137  | -0.448            | 0.175              | 0.397 | 0.167   | -0.057            | 0.390              | 0.148 |
| P_Sci            | 0.023   | -0.298            | 0.344              | 0.888 | 0.133   | -0.078            | 0.344              | 0.218 |
| P_Female*Age     | 0.058   | -0.054            | 0.169              | 0.320 | 0.019   | -0.042            | 0.080              | 0.544 |
| P_Female*Female  | -0.047  | -0.124            | 0.029              | 0.236 | 0.063   | -0.018            | 0.144              | 0.131 |
| P_Female*Non-    | 0.024   | -0.084            | 0.133              | 0.662 | 0.014   | -0.025            | 0.054              | 0.469 |
| P_Female*Physics | 0.019   | -0.023            | 0.061              | 0.385 | 0.002   | -0.024            | 0.027              | 0.907 |
| P_Female*Att     | 0.032   | -0.085            | 0.149              | 0.597 | 0.019   | -0.056            | 0.095              | 0.617 |
| P_Female*Comp    | 0.046   | -0.067            | 0.158              | 0.434 | 0.030   | -0.042            | 0.102              | 0.422 |
| P_Female*Soc     | 0.113   | 0.013             | 0.212              | 0.028 | -0.014  | -0.062            | 0.034              | 0.569 |
| P_Female*Mor     | -0.100  | -0.228            | 0.028              | 0.128 | -0.020  | -0.084            | 0.045              | 0.550 |
| P_Female*P_Age   | -0.151  | -0.637            | 0.335              | 0.548 | 0.145   | -0.091            | 0.380              | 0.232 |
| P_Female*P_Sci   | 0.181   | -0.179            | 0.540              | 0.334 | 0.025   | -0.186            | 0.236              | 0.818 |

*Table S13. Regression coefficients for "Good Scientist" judgments when interactions between Participant Gender and all other predictors are included.*

## Results for each gender and ethnicity

For completeness (and as requested by a reviewer), Tables S14 and S15 present the results of analysing the pooled data from Studies 1 and 2 split by face-gender and face-ethnicity. (The sample sizes are small for the female- and non-white groups, resulting in low power.)

| INTEREST JUDGMENTS |            |                   |                    |          |              |                   |                    |          |
|--------------------|------------|-------------------|--------------------|----------|--------------|-------------------|--------------------|----------|
|                    | Male Faces |                   |                    |          | Female Faces |                   |                    |          |
|                    | B          | Cl <sub>low</sub> | Cl <sub>high</sub> | <i>p</i> | B            | Cl <sub>low</sub> | Cl <sub>high</sub> | <i>p</i> |
| Intercept          | 4.748      | 4.534             | 4.963              | 0.000    | 5.103        | 4.851             | 5.355              | 0.000    |
| Age                | 0.099      | 0.038             | 0.161              | 0.002    | -0.061       | -0.146            | 0.024              | 0.160    |
| Non-white          | 0.034      | -0.011            | 0.080              | 0.137    | -0.007       | -0.080            | 0.065              | 0.843    |
| Physics            | -0.005     | -0.034            | 0.024              | 0.738    | -0.020       | -0.072            | 0.031              | 0.442    |
| Attractiveness     | 0.237      | 0.169             | 0.305              | 0.000    | 0.230        | 0.119             | 0.341              | 0.000    |
| Competence         | 0.212      | 0.129             | 0.296              | 0.000    | 0.198        | 0.107             | 0.289              | 0.000    |
| Sociability        | 0.065      | -0.010            | 0.141              | 0.091    | 0.001        | -0.109            | 0.111              | 0.985    |
| Morality           | 0.129      | 0.045             | 0.214              | 0.003    | 0.118        | -0.014            | 0.250              | 0.083    |
| P_Age              | -0.015     | -0.230            | 0.200              | 0.891    | -0.070       | -0.323            | 0.184              | 0.590    |
| P_Female           | 0.155      | -0.066            | 0.376              | 0.172    | 0.288        | 0.028             | 0.548              | 0.032    |
| P_Sci              | 0.303      | 0.082             | 0.524              | 0.008    | 0.107        | -0.151            | 0.366              | 0.417    |

  

|                | White Faces |                   |                    |          | Non-white Faces |                   |                    |          |
|----------------|-------------|-------------------|--------------------|----------|-----------------|-------------------|--------------------|----------|
|                | B           | Cl <sub>low</sub> | Cl <sub>high</sub> | <i>p</i> | B               | Cl <sub>low</sub> | Cl <sub>high</sub> | <i>p</i> |
| Intercept      | 4.816       | 4.606             | 5.026              | 0.000    | 4.873           | 4.615             | 5.131              | 0.000    |
| Age            | 0.074       | 0.014             | 0.133              | 0.016    | 0.017           | -0.076            | 0.110              | 0.722    |
| Female         | -0.057      | -0.132            | 0.019              | 0.145    | -0.095          | -0.224            | 0.033              | 0.153    |
| Physics        | -0.013      | -0.041            | 0.015              | 0.375    | 0.058           | -0.021            | 0.137              | 0.155    |
| Attractiveness | 0.259       | 0.187             | 0.330              | 0.000    | 0.299           | 0.184             | 0.415              | 0.000    |
| Competence     | 0.217       | 0.140             | 0.295              | 0.000    | 0.125           | 0.014             | 0.237              | 0.034    |
| Sociability    | 0.063       | -0.015            | 0.141              | 0.115    | 0.035           | -0.129            | 0.199              | 0.680    |
| Morality       | 0.143       | 0.049             | 0.237              | 0.003    | 0.149           | -0.061            | 0.358              | 0.171    |
| P_Age          | -0.025      | -0.236            | 0.186              | 0.816    | -0.046          | -0.301            | 0.210              | 0.727    |
| P_Female       | 0.193       | -0.024            | 0.410              | 0.084    | 0.101           | -0.166            | 0.369              | 0.458    |
| P_Sci          | 0.276       | 0.060             | 0.492              | 0.014    | 0.147           | -0.114            | 0.408              | 0.273    |

Table S14. Regression coefficients for Interest Judgments when data from Studies 1 and 2 are pooled, with separate analyses for each gender and ethnicity.

**“GOOD SCIENTIST” JUDGMENTS**

|                | Male Faces |                   |                    |          | Female Faces |                   |                    |          |
|----------------|------------|-------------------|--------------------|----------|--------------|-------------------|--------------------|----------|
|                | B          | Cl <sub>low</sub> | Cl <sub>high</sub> | <i>p</i> | B            | Cl <sub>low</sub> | Cl <sub>high</sub> | <i>p</i> |
| Intercept      | 5.808      | 5.625             | 5.992              | 0.000    | 5.564        | 5.335             | 5.792              | 0.000    |
| Age            | 0.141      | 0.070             | 0.212              | 0.000    | -0.155       | -0.261            | -0.049             | 0.005    |
| Non-white      | 0.063      | 0.008             | 0.117              | 0.024    | 0.035        | -0.058            | 0.128              | 0.462    |
| Physics        | 0.026      | -0.011            | 0.064              | 0.174    | 0.026        | -0.044            | 0.096              | 0.462    |
| Attractiveness | -0.271     | -0.350            | -0.193             | 0.000    | -0.450       | -0.579            | -0.321             | 0.000    |
| Competence     | 0.596      | 0.511             | 0.681              | 0.000    | 0.511        | 0.402             | 0.620              | 0.000    |
| Sociability    | -0.134     | -0.204            | -0.065             | 0.000    | -0.161       | -0.296            | -0.026             | 0.021    |
| Morality       | 0.161      | 0.071             | 0.252              | 0.001    | 0.132        | -0.027            | 0.291              | 0.107    |
| P_Age          | -0.014     | -0.199            | 0.170              | 0.879    | -0.013       | -0.242            | 0.215              | 0.911    |
| P_Female       | 0.049      | -0.137            | 0.234              | 0.608    | 0.186        | -0.044            | 0.415              | 0.115    |
| P_Sci          | 0.028      | -0.156            | 0.211              | 0.767    | 0.409        | 0.184             | 0.634              | 0.001    |

  

|                | White Faces |                   |                    |          | Non-white Faces |                   |                    |          |
|----------------|-------------|-------------------|--------------------|----------|-----------------|-------------------|--------------------|----------|
|                | B           | Cl <sub>low</sub> | Cl <sub>high</sub> | <i>p</i> | B               | Cl <sub>low</sub> | Cl <sub>high</sub> | <i>p</i> |
| Intercept      | 5.701       | 5.517             | 5.885              | 0.000    | 6.260           | 6.030             | 6.490              | 0.000    |
| Age            | 0.089       | 0.019             | 0.159              | 0.014    | 0.027           | -0.102            | 0.157              | 0.682    |
| Female         | 0.001       | -0.074            | 0.076              | 0.979    | -0.058          | -0.202            | 0.086              | 0.434    |
| Physics        | 0.033       | -0.004            | 0.069              | 0.082    | 0.022           | -0.077            | 0.121              | 0.663    |
| Attractiveness | -0.343      | -0.429            | -0.257             | 0.000    | -0.260          | -0.399            | -0.121             | 0.001    |
| Competence     | 0.606       | 0.523             | 0.688              | 0.000    | 0.507           | 0.370             | 0.643              | 0.000    |
| Sociability    | -0.150      | -0.222            | -0.079             | 0.000    | -0.027          | -0.231            | 0.178              | 0.800    |
| Morality       | 0.172       | 0.073             | 0.271              | 0.001    | 0.136           | -0.113            | 0.384              | 0.289    |
| P_Age          | -0.012      | -0.198            | 0.173              | 0.896    | -0.006          | -0.222            | 0.209              | 0.955    |
| P_Female       | 0.069       | -0.118            | 0.255              | 0.471    | 0.101           | -0.114            | 0.315              | 0.360    |
| P_Sci          | 0.100       | -0.085            | 0.284              | 0.292    | 0.076           | -0.135            | 0.288              | 0.480    |

*Table S15. Regression coefficients for “Good Scientist” Judgments when data from Studies 1 and 2 are pooled, with separate analyses for each gender and ethnicity.*



|         | Predictor            | B      | CI <sub>low</sub> | CI <sub>high</sub> | p     |
|---------|----------------------|--------|-------------------|--------------------|-------|
| Study 3 | Video                | 0.104  | 0.030             | 0.178              | .006  |
|         | Physics              | -0.096 | -0.178            | -0.013             | .023  |
|         | Gender               | -0.017 | -0.098            | 0.064              | .682  |
|         | Video*Physics        | -0.024 | -0.106            | 0.059              | .574  |
|         | Video*Female         | 0.056  | -0.025            | 0.136              | .178  |
|         | Physics*Female       | 0.118  | 0.025             | 0.212              | .013  |
|         | Video*Physics*Female | 0.075  | -0.018            | 0.168              | .116  |
|         | P_Age                | -0.089 | -0.164            | -0.014             | .020  |
|         | P_Female             | -0.134 | -0.210            | -0.058             | <.001 |
|         | P_Sci                | -0.028 | -0.104            | -0.048             | .467  |
| Study 4 | Competence           | 0.083  | 0.007             | 0.158              | .032  |
|         | Attractiveness       | 0.052  | -0.027            | 0.131              | .196  |
|         | Comp*Att             | -0.059 | -0.129            | 0.010              | .093  |
|         | P_Age                | 0.104  | -0.014            | 0.223              | .084  |
|         | P_Female             | 0.124  | 0.007             | 0.240              | .039  |
|         | P_Sci                | 0.380  | 0.261             | 0.499              | <.001 |
|         | Comp*P_Female        | -0.051 | -0.129            | 0.026              | .196  |
|         | Comp*P_Age           | -0.023 | -0.099            | 0.054              | .564  |
|         | Comp*P_Sci           | 0.029  | -0.049            | 0.107              | .471  |
|         | Att*P_Female         | 0.009  | -0.072            | 0.091              | .821  |
|         | Att*P_Age            | 0.060  | -0.021            | 0.140              | .148  |
|         | Att*P_Sci            | -0.038 | -0.120            | 0.043              | .357  |

Table S16. Regression coefficients for Studies 3 and 4.

|         | Predictor               | B      | Cl <sub>low</sub> | Cl <sub>high</sub> | p     |
|---------|-------------------------|--------|-------------------|--------------------|-------|
| Study 5 | Facetype                | 0.161  | 0.083             | 0.238              | <.001 |
|         | Physics                 | 0.119  | 0.028             | 0.210              | .011  |
|         | Female                  | 0.017  | -0.074            | 0.108              | .716  |
|         | Facetype*Physics        | 0.001  | -0.076            | 0.078              | .978  |
|         | Facetype*Female         | 0.024  | -0.054            | 0.101              | .550  |
|         | Physics*Female          | 0.009  | -0.082            | 0.101              | .844  |
|         | Facetype*Physics*Female | -0.051 | -0.129            | 0.026              | .193  |
|         | P_Female                | 0.081  | -0.014            | 0.175              | .094  |
|         | P_Age                   | -0.068 | -0.160            | 0.024              | .150  |
|         | P_Sci                   | 0.150  | 0.055             | 0.245              | .002  |
| Study 6 | Competence              | 0.142  | 0.104             | 0.179              | <.001 |
|         | Attractiveness          | -0.017 | -0.053            | 0.020              | .368  |
|         | Comp. * Att.            | -0.016 | -0.052            | 0.021              | .402  |
|         | P_Female                | 0.102  | 0.041             | 0.163              | .001  |
|         | P_Age                   | -0.080 | -0.140            | -0.020             | .009  |
|         | P_Sci                   | 0.094  | 0.033             | 0.155              | .003  |
|         | Comp*P_Female           | 0.001  | -0.037            | 0.040              | .950  |
|         | Comp*P_Age              | 0.013  | -0.024            | 0.050              | .497  |
|         | Comp*P_Sci              | 0.037  | -0.002            | 0.075              | .060  |
|         | Att*P_Female            | -0.010 | -0.047            | 0.028              | .610  |
|         | Att*P_Age               | 0.006  | -0.031            | 0.042              | .758  |
|         | Att*P_Sci               | -0.022 | -0.059            | 0.015              | .252  |

Table S17. Regression coefficients for Studies 5 and 6

### Additional Study

We conducted an additional face-rating study using 200 neutral-expression photos from the Park Aging Mind Face Database [2], comprising 25 men and 25 women in each of 4 age-bands (18-29; 30-49; 50-69; 70-94), with 10-15% non-white faces per group. Using an MTurk sample, we had 80 participants rate the faces on the same traits as in Study 1; the faces were randomly divided into 2 sets and 40 participants rated all the faces in each set on all dimensions. A further 30 participants gave Interest judgments for each face and 30 gave “Good scientist” judgments, like those in Studies 1 and 2. In addition, 31 participants were asked to indicate how far each person looked like “a scientist” (Scientist judgments; this differs from the other judgments, which are predicated upon the person being a scientist, and was an exploratory variable). Other aspects of the procedure and analysis were the same as for Studies 1 and 2.

The regression coefficients are shown in Table S18. The pattern is similar to our main studies: the confidence intervals are often somewhat wider, most likely because of the smaller samples and more heterogeneous stimuli, but interest was again greater for attractive and competent-looking faces and for older individuals (although there was little effect of perceived morality), and good-scientist judgments were positively related to apparent competence and morality but negatively associated with attractiveness and perceived sociability. “Good Scientist” ratings were also lower for non-white than for white faces, possibly because there were more African-American faces in this face-set. Also in contrast to our main studies is the finding that females received lower “Good Scientist” ratings than did males.

| INTEREST JUDGMENTS |        |                   |                    |       |
|--------------------|--------|-------------------|--------------------|-------|
|                    | B      | CI <sub>low</sub> | CI <sub>high</sub> | p     |
| Age                | 0.198  | -0.047            | 0.442              | 0.122 |
| Female             | -0.048 | -0.185            | 0.088              | 0.492 |
| Non-white          | 0.051  | -0.028            | 0.131              | 0.213 |
| Attractiveness     | 0.199  | 0.016             | 0.382              | 0.040 |
| Competence         | 0.197  | 0.035             | 0.358              | 0.022 |
| Sociability        | 0.079  | -0.059            | 0.217              | 0.263 |
| Morality           | 0.003  | -0.161            | 0.167              | 0.973 |
| P_Age              | 0.472  | -0.016            | 0.960              | 0.068 |
| P_Female           | 0.279  | -0.229            | 0.787              | 0.290 |
| P_Sci              | 0.408  | -0.082            | 0.899              | 0.113 |

  

| "GOOD SCIENTIST" JUDGMENTS |        |                   |                    |       |
|----------------------------|--------|-------------------|--------------------|-------|
|                            | B      | CI <sub>low</sub> | CI <sub>high</sub> | p     |
| Age                        | -0.163 | -0.402            | 0.076              | 0.185 |
| Female                     | -0.249 | -0.428            | -0.069             | 0.009 |
| Non-white                  | -0.116 | -0.221            | -0.011             | 0.034 |
| Attractiveness             | -0.161 | -0.359            | 0.036              | 0.112 |
| Competence                 | 0.914  | 0.724             | 1.104              | 0.001 |
| Sociability                | -0.204 | -0.434            | 0.027              | 0.085 |
| Morality                   | 0.233  | -0.058            | 0.524              | 0.119 |
| P_Age                      | 0.055  | -0.362            | 0.471              | 0.799 |
| P_Female                   | -0.243 | -0.659            | 0.173              | 0.262 |
| P_Sci                      | 0.417  | 0.000             | 0.833              | 0.06  |

  

| SCIENTIST JUDGMENTS |        |                   |                    |       |
|---------------------|--------|-------------------|--------------------|-------|
|                     | B      | CI <sub>low</sub> | CI <sub>high</sub> | p     |
| Age                 | -0.268 | -0.483            | -0.053             | 0.016 |
| Female              | -0.182 | -0.346            | -0.018             | 0.034 |
| Non-white           | -0.028 | -0.122            | 0.066              | 0.557 |
| Attractiveness      | -0.355 | -0.577            | -0.132             | 0.002 |
| Competence          | 1.074  | 0.866             | 1.282              | 0.000 |
| Sociability         | -0.141 | -0.390            | 0.109              | 0.270 |
| Morality            | 0.134  | -0.188            | 0.455              | 0.416 |
| P_Age               | 0.073  | -0.258            | 0.405              | 0.667 |
| P_Female            | -0.297 | -0.651            | 0.057              | 0.110 |
| P_Sci               | 0.038  | -0.326            | 0.401              | 0.841 |

Table S18. Regression coefficients from Supplementary Study.

## References

- [1] Faul, F., Erdfelder, E., Lang, A-G., & Buchner, A. (2007). G\*Power 3: A flexible statistical power analysis program for the social, behavioral, and biomedical sciences. *Behavior Research Methods, 39*(2), 175-191.
- [2] Minear, M., & Park, D.C. (2004). A lifespan database of adult facial stimuli. *Behavior Research Methods, Instruments, & Computers, 36*(4), 630-633.
- [3] Willis, J., & Todorov, A. (2006). First impressions: Making up your mind after a 100-ms exposure to a face. *Psychological Science, 17*(7), 592-598.
